# Supplementary material for: Correction to: The Japanese version of the questionnaire about the process of recovery: development and validity and reliability testing
Source: Springer Nature journal article supplement (doi:10.1186/s12888-020-2430-y), 2020-01-09
Supplement: MOESM1 [file 17786452]

Additional file 1: Japanese version of the Questionnaire about the Process of Recovery (QPR-J)

日本語版リカバリープロセス尺度(QPR-J) 2020/1/9 版

この調査では「リカバリー」についてお聞きします。「リカバリー」は、「精神的健康に困難を抱えながらも、夢や希望をもち、社会の中で自分の人生に新たな目的や意義を発展させ、主体的に生きることをさし、個人的で独自の過程」といわれています。リカバリーについて、現在、特にここ7日間のあなたの状態を思い浮かべてください。あなたの体験を最も表している番号に○をつけてください。

| リカバリーについて、現在、特にここ7日間のあなたの状態を思い浮かべてください。あなたの体験を最も表している番号に○をつけてください。 | 全くそう<br>思わない | そう<br>思わない | どちらとも<br>言えない | そう思う | とても<br>そう思う |
|--------------------------------------------------------------------|--------------|------------|---------------|------|-------------|
| 1 自分自身のことを以前よりも良く思える                                               | 0            | 1          | 2             | 3    | 4           |
| 2 人生で思い切って何かをやってみようと思える                                            | 0            | 1          | 2             | 3    | 4           |
| 3 周りの人とプラスになる人間関係を築くことができる                                         | 0            | 1          | 2             | 3    | 4           |
| 4 社会とのつながりがないというよりも社会の一員だと感じている                                    | 0            | 1          | 2             | 3    | 4           |
| 5 自分の意見をちゃんと伝えることができる                                              | 0            | 1          | 2             | 3    | 4           |
| 6 自分の人生には意味があると感じている                                               | 0            | 1          | 2             | 3    | 4           |
| 7 これまでの経験で成長することができた                                               | 0            | 1          | 2             | 3    | 4           |
| 8 これまで自分に起きたことを受け入れて、前に進めるようになった                                   | 0            | 1          | 2             | 3    | 4           |
| 9 もっと元気になりたいと強く思っている                                               | 0            | 1          | 2             | 3    | 4           |
| 10 自分がしたよいことを思い返すことができる                                            | 0            | 1          | 2             | 3    | 4           |
| 11 自分自身のことを以前よりも理解することができるようになった                                   | 0            | 1          | 2             | 3    | 4           |
| 12 自分の生活に責任を持つことができる                                               | 0            | 1          | 2             | 3    | 4           |
| 13 支援機関(就労支援施設・相談支援機関など)を利用することができる                                | 0            | 1          | 2             | 3    | 4           |
| 14 精神科での治療のメリット・デメリットを比べて選ぶことができる                                  | 0            | 1          | 2             | 3    | 4           |
| 15 自分の経験を通して、以前よりも思いやりのある人間になったと感じる                                | 0            | 1          | 2             | 3    | 4           |
| 16 似たような経験をした人たちと会うと気持ちが楽になる                                       | 0            | 1          | 2             | 3    | 4           |
| 17 私の「リカバリー」体験は元気になることに対する周りの人のイメージを変える一助となった                      | 0            | 1          | 2             | 3    | 4           |
| 18 自分のつらかった経験の意味を見出すことができる                                         | 0            | 1          | 2             | 3    | 4           |
| 19 前向きに人生に取り組むことができる                                               | 0            | 1          | 2             | 3    | 4           |
| 20 専門職(医師・看護師・心理士・精神保健福祉士など)の見方が、物事の考え方のすべてではないと思う                 | 0            | 1          | 2             | 3    | 4           |
| 21 自分の様々な生活場面を自分でコントロールできる                                         | 0            | 1          | 2             | 3    | 4           |
| 22 楽しいことをする時間をつくることができる                                            | 0            | 1          | 2             | 3    | 4           |
